# Supplementary material
Source: publisher figshare collection journal article supplement (https://rs.figshare.com/ndownloader/files/28067806)
Supplement: Supplementary file 1 [file 28067806]

## Sheet: heart rate per min
motionless at surface
species	ID	Time and date (yy/mm/dd/hh/mm/ss)	Median heart rate per minute (bpm)
False killer whale	pc_km	19.10.30 08:22:00	38.2166
False killer whale	pc_km	19.10.30 08:23:00	27.6197
False killer whale	pc_km	19.10.30 08:24:00	26.1169
False killer whale	pc_km	19.10.30 08:25:00	29.6296
False killer whale	pc_km	19.10.30 08:26:00	28.103
False killer whale	pc_km	19.10.30 08:27:00	32.0856
False killer whale	pc_km	19.10.30 08:28:00	39.8671
False killer whale	pc_km	19.10.30 08:29:00	37.1517
False killer whale	pc_km	19.10.30 16:24:00	51.9481
False killer whale	pc_km	19.10.30 16:25:00	42.2556
False killer whale	pc_km	19.10.30 16:26:00	46.875
False killer whale	pc_km	19.10.30 16:27:00	54.2986
False killer whale	pc_km	19.10.30 16:28:00	43.7172
False killer whale	pc_km	19.10.30 16:29:00	54.0639
False killer whale	pc_km	19.10.30 16:30:00	51.8361
False killer whale	pc_km	19.10.30 16:31:00	59.7074
Risso's dolphin	gg_sm	19.10.31 09:00:00	73.1707
Risso's dolphin	gg_sm	19.10.31 09:01:00	65.5738
Risso's dolphin	gg_sm	19.10.31 09:02:00	69.3642
Risso's dolphin	gg_sm	19.10.31 09:03:00	62.1762
Risso's dolphin	gg_sm	19.10.31 09:04:00	63.4921
Risso's dolphin	gg_sm	19.10.31 14:50:00	80
Risso's dolphin	gg_sm	19.10.31 14:51:00	76.6969
Risso's dolphin	gg_sm	19.10.31 14:52:00	81.6326
Risso's dolphin	gg_sm	19.10.31 14:53:00	83.3333
Risso's dolphin	gg_sm	19.10.31 14:54:00	89.2206
Risso's dolphin	gg_sm	19.10.31 14:55:00	76.9231
Risso's dolphin	gg_sm	19.10.31 14:56:00	88.8889
Risso's dolphin	gg_sm	19.10.31 14:57:00	97.561
Risso's dolphin	gg_sm	19.10.31 14:58:00	78.9474
Risso's dolphin	gg_sm	19.10.31 14:59:00	82.1918
Risso's dolphin	gg_sm	19.10.31 15:00:00	90.5673
Risso's dolphin	gg_sm	19.10.31 15:01:00	82.1918
Risso's dolphin	gg_mf	19.10.30 08:35:00	31.2157
Risso's dolphin	gg_mf	19.10.30 08:36:00	46.1539
Risso's dolphin	gg_mf	19.10.30 08:37:00	41.2376
Risso's dolphin	gg_mf	19.10.30 08:38:00	45.1128
Risso's dolphin	gg_mf	19.10.30 08:39:00	45.4546
Risso's dolphin	gg_mf	19.10.30 08:40:00	42.4791
Risso's dolphin	gg_mf	19.10.30 08:41:00	38.8349
Risso's dolphin	gg_mf	19.10.30 08:42:00	49.5868
Risso's dolphin	gg_mf	19.10.30 08:43:00	39.8671
Risso's dolphin	gg_mf	19.10.30 08:44:00	42.4028
Risso's dolphin	gg_mf	19.10.29 16:32:00	41.958
Risso's dolphin	gg_mf	19.10.29 16:33:00	45.1128
Risso's dolphin	gg_mf	19.10.29 16:34:00	45.977
Risso's dolphin	gg_mf	19.10.29 16:35:00	44.3408
Risso's dolphin	gg_mf	19.10.29 16:36:00	48
Risso's dolphin	gg_mf	19.10.29 16:37:00	49.3827
Risso's dolphin	gg_mf	19.10.29 16:38:00	57.6923
Risso's dolphin	gg_mf	19.10.29 16:39:00	52.6326
Risso's dolphin	gg_mf	19.10.29 16:40:00	41.8118
Risso's dolphin	gg_nf	19.11.1 08:29:00	41.2371
Risso's dolphin	gg_nf	19.11.1 08:30:00	42.2535
Risso's dolphin	gg_nf	19.11.1 08:31:00	44.9445
Risso's dolphin	gg_nf	19.11.1 08:32:00	43.5573
Risso's dolphin	gg_nf	19.10.31 16:20:00	42.5532
Risso's dolphin	gg_nf	19.10.31 16:21:00	40
Risso's dolphin	gg_nf	19.10.31 16:22:00	45.977
Risso's dolphin	gg_nf	19.10.31 16:23:00	41.3793
Risso's dolphin	gg_rm	19.10.31 08:30:00	62.8272
Risso's dolphin	gg_rm	19.10.31 08:31:00	62.1762
Risso's dolphin	gg_rm	19.10.31 08:32:00	57.5543
Risso's dolphin	gg_rm	19.10.31 08:33:00	56.3393
Risso's dolphin	gg_rm	19.10.31 08:34:00	58.5366
Risso's dolphin	gg_rm	19.10.31 08:35:00	59.8537
Risso's dolphin	gg_rm	19.10.31 08:36:00	56.6038
Risso's dolphin	gg_rm	19.10.31 08:37:00	52.4017
Risso's dolphin	gg_rm	19.10.31 08:38:00	50.8475
Risso's dolphin	gg_rm	19.10.31 08:39:00	52.061
Risso's dolphin	gg_rm	19.10.29 16:48:00	68.9655
Risso's dolphin	gg_rm	19.10.29 16:49:00	66.7181
Risso's dolphin	gg_rm	19.10.29 16:50:00	69.3642
Risso's dolphin	gg_rm	19.10.29 16:51:00	60.1507
Risso's dolphin	gg_rm	19.10.29 16:52:00	62.6636
Risso's dolphin	gg_rm	19.10.29 16:53:00	67.4157
Risso's dolphin	gg_rm	19.10.29 16:54:00	58.8235
Risso's dolphin	gg_rm	19.10.29 16:55:00	63.3603
Risso's dolphin	gg_rm	19.10.29 16:56:00	56.0748
